# Supplementary material
Source: MDPI journal article supplement (https://www.mdpi.com/2075-4701/14/3/360)
Supplement: s1 [file s1]

## **Supplementary Materials**

### **$\text{Cu}_{2-x}\text{S}$ and $\text{Cu}_{2-x}\text{Se}$ Alloys: Investigating the Influence of Ag, Zn, and Ni Doping on Structure and Transport Behavior**

**Andrzej Mikuła \*, Tomasz Kurek, Miłosz Kożusznik and Paweł Nieroda**

\* Correspondence: amikula@agh.edu.pl

**Table S1.** Density of copper (I) chalcogenide sinters.

| Material                                   | Density [g cm <sup>-1</sup> ] | Material                                    | Density [g cm <sup>-1</sup> ] |
|--------------------------------------------|-------------------------------|---------------------------------------------|-------------------------------|
| <b>Cu<sub>1.97</sub>S</b>                  | 5.51                          | <b>Cu<sub>1.8</sub>Se</b>                   | 6.10                          |
| <b>Cu<sub>1.96</sub>Ag<sub>0.01</sub>S</b> | 5.37                          | <b>Cu<sub>1.79</sub>Ag<sub>0.01</sub>Se</b> | 6.13                          |
| <b>Cu<sub>1.96</sub>Ni<sub>0.01</sub>S</b> | 5.54                          | <b>Cu<sub>1.79</sub>Ni<sub>0.01</sub>Se</b> | 6.06                          |
| <b>Cu<sub>1.96</sub>Zn<sub>0.01</sub>S</b> | 5.49                          | <b>Cu<sub>1.79</sub>Zn<sub>0.01</sub>Se</b> | 6.04                          |

**Table S2.** Unit cell parameters together with fitting parameters for Cu<sub>1.97</sub>S and Cu<sub>1.8</sub>Se sintered pellets.

| Structural parameter                                                          | This work | Reference card | GoF [-] | wRp [-] |
|-------------------------------------------------------------------------------|-----------|----------------|---------|---------|
| <b>Cu<sub>1.97</sub>S – Reference card Cu<sub>2</sub>S (ICDD 01-083-1462)</b> |           |                |         |         |
| <b>a [Å]</b>                                                                  | 15.229    | 15.246         | 3.26    | 14.31   |
| <b>b [Å]</b>                                                                  | 11.882    | 11.884         |         |         |
| <b>c [Å]</b>                                                                  | 13.495    | 13.494         |         |         |
| <b>β [°]</b>                                                                  | 116.266   | 116.350        |         |         |
| <b>Cu<sub>1.8</sub>Se – Reference card (ICSD 98-015-0759)</b>                 |           |                |         |         |
| <b>a [Å]</b>                                                                  | 5.754     | 5.750          | 3.72    | 8.10    |

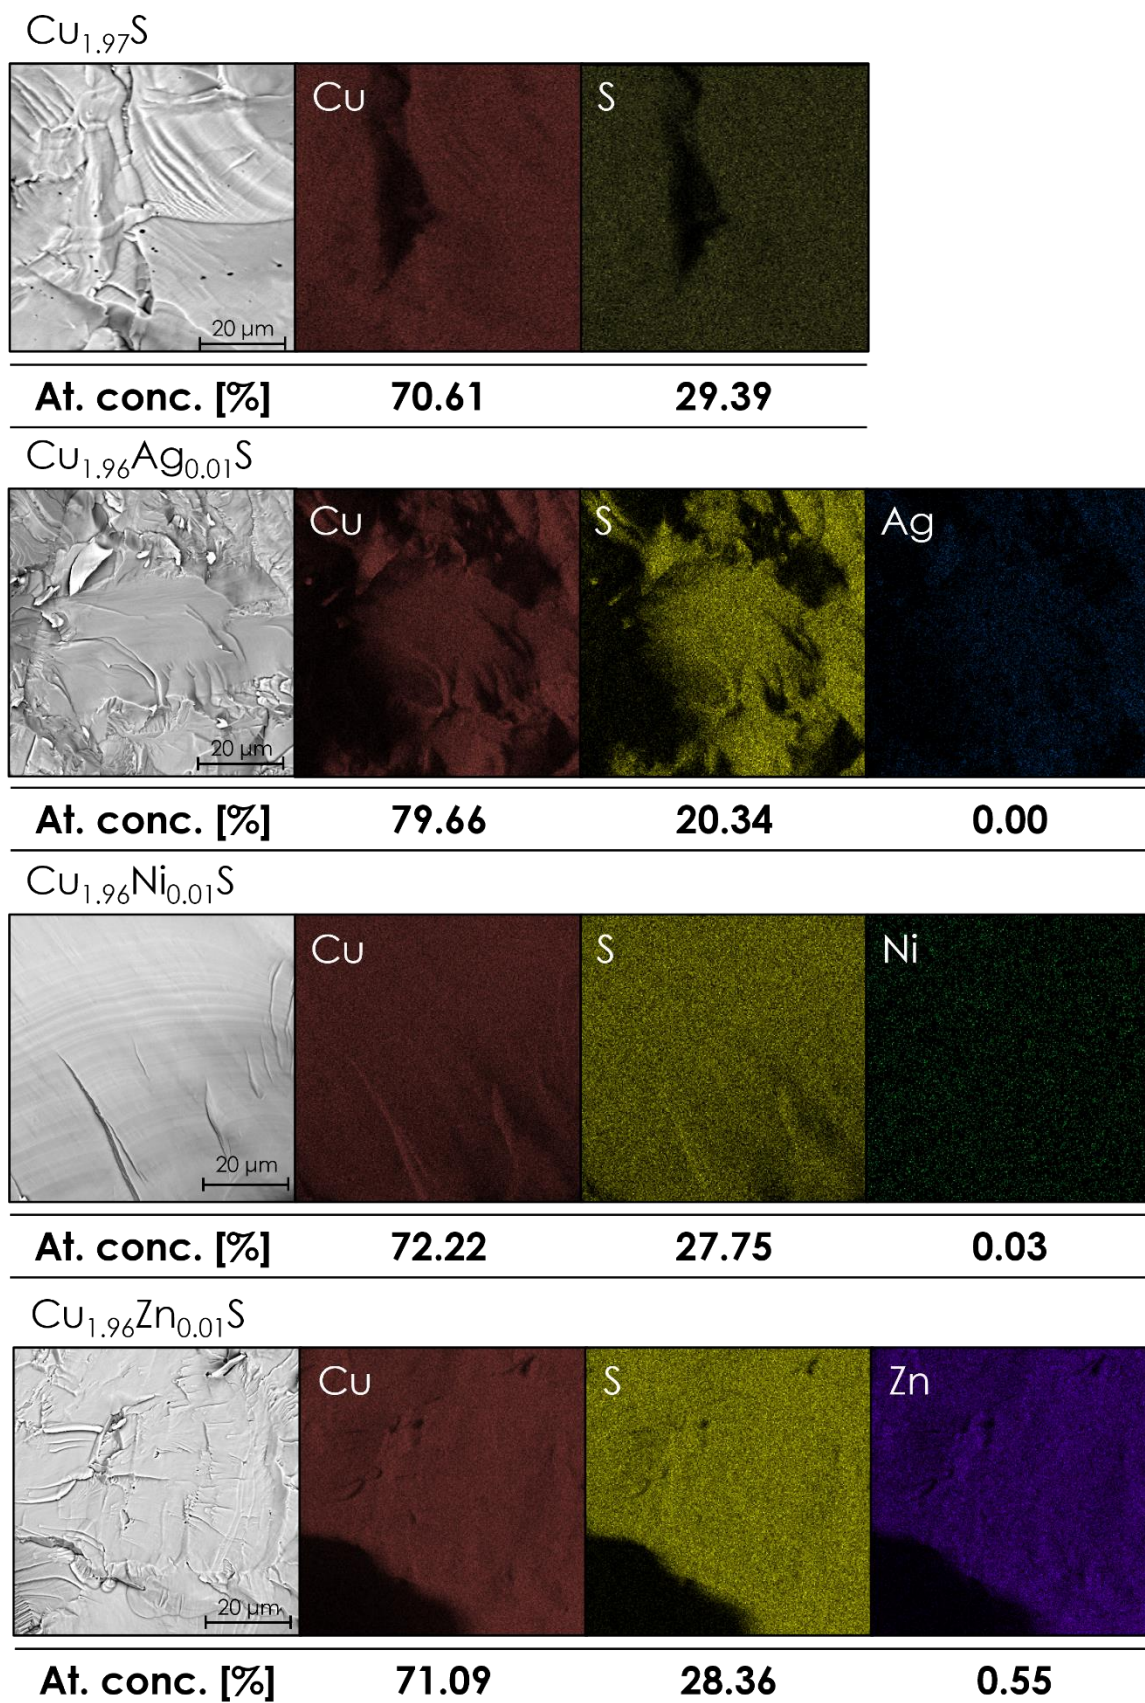

**Figure S1.** SEM+EDX analysis of  $\text{Cu}_{1.97-x}\text{M}_x\text{S}$  ( $\text{M} = \text{Ag}, \text{Ni}, \text{Zn}; x = 0, 0.01$ ) ingots.



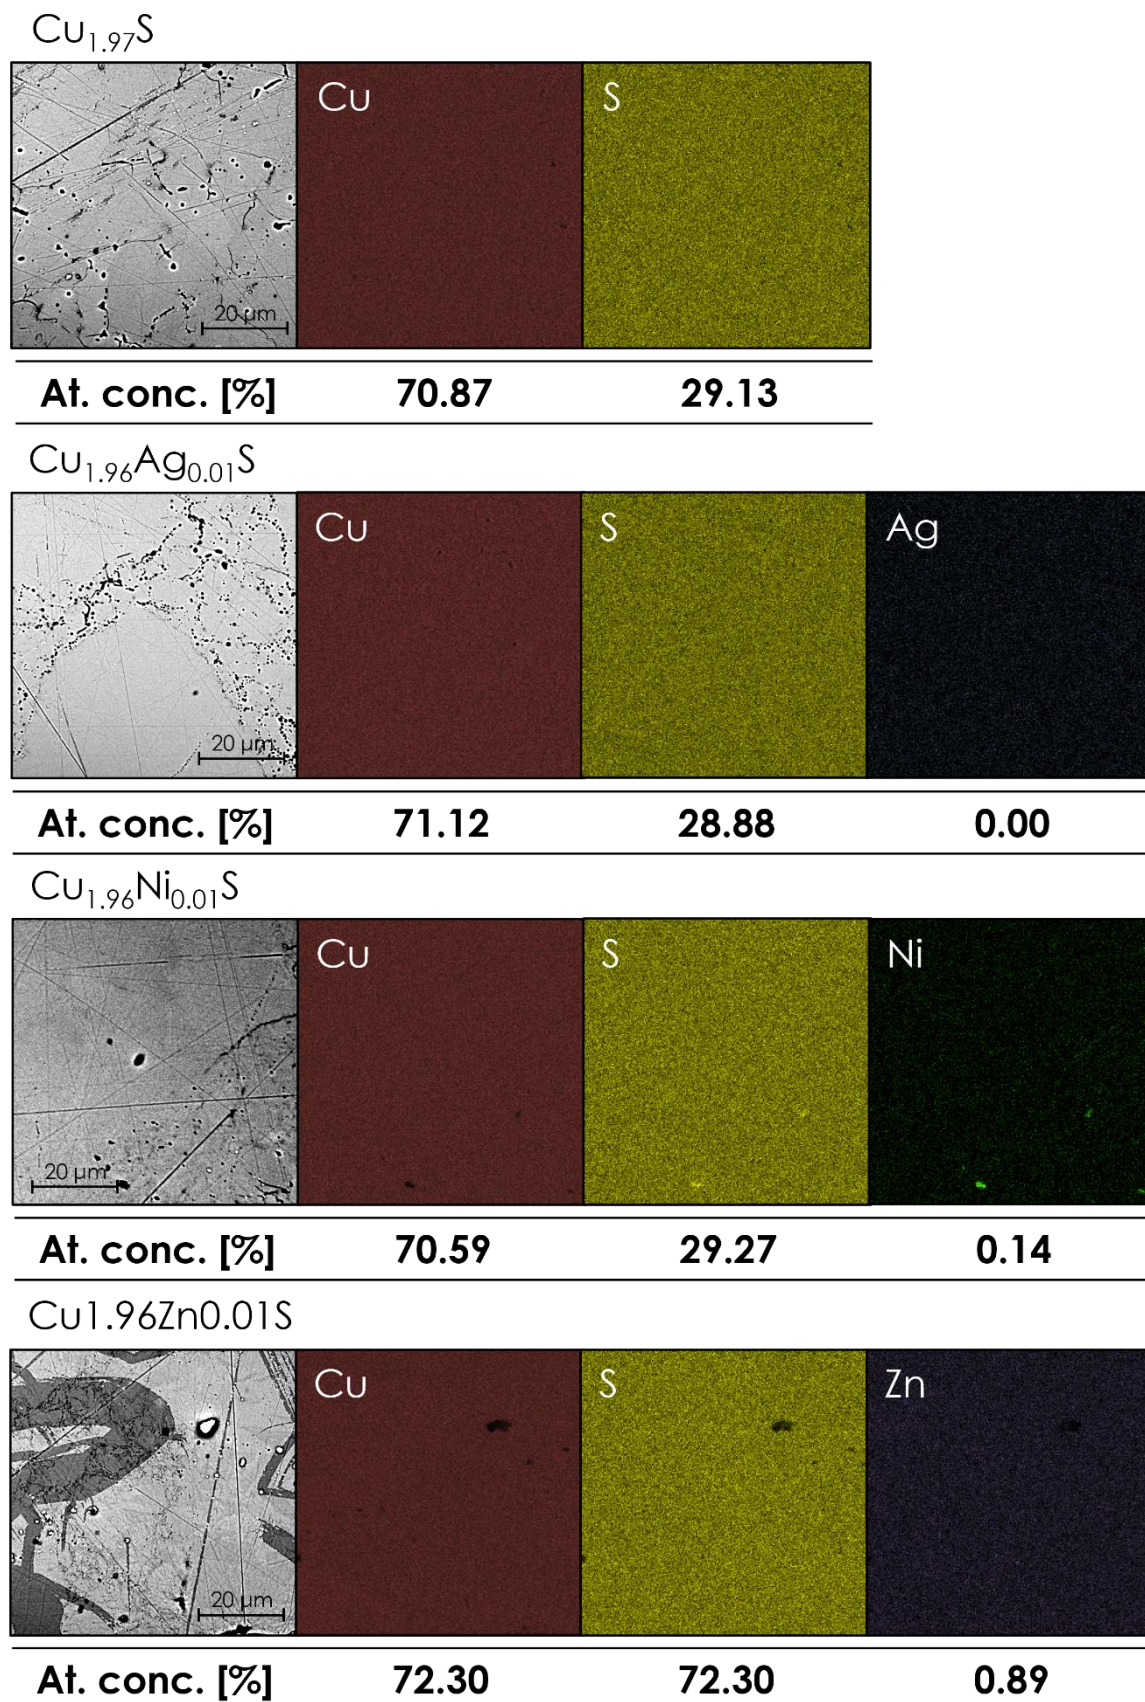

**Figure S2.** SEM+EDX analysis of  $\text{Cu}_{1.97-x}\text{M}_x\text{S}$  ( $\text{M} = \text{Ag}, \text{Ni}, \text{Zn}$ ;  $x = 0, 0.01$ ) pellets.



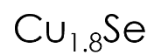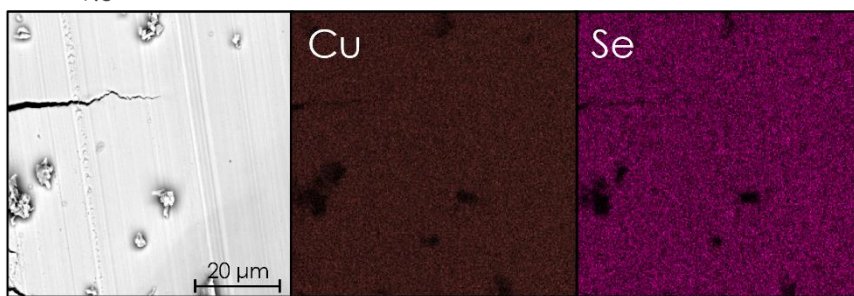

| At. conc. [%] | 55.78 | 44.22 |
|---------------|-------|-------|
|---------------|-------|-------|

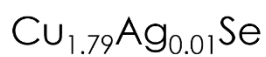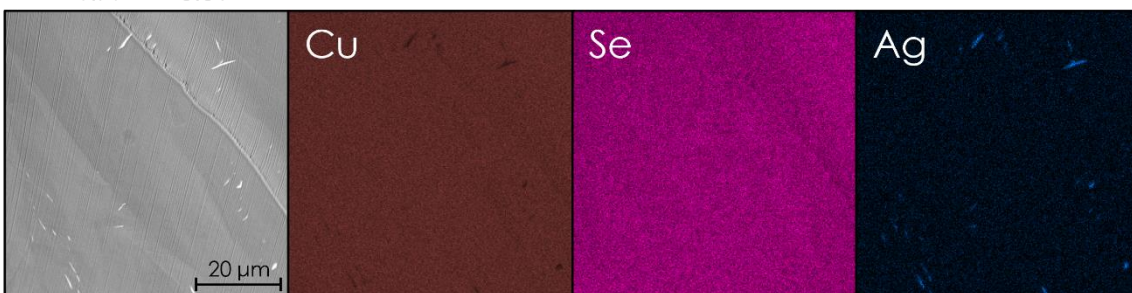

| At. conc. [%] | 60.60 | 39.13 | 0.26 |
|---------------|-------|-------|------|
|---------------|-------|-------|------|

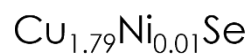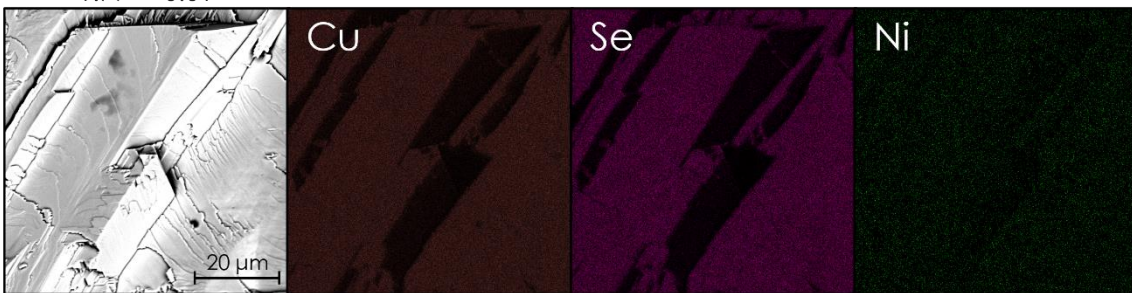

| At. conc. [%] | 59.94 | 40.06 | 0.00 |
|---------------|-------|-------|------|
|---------------|-------|-------|------|

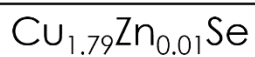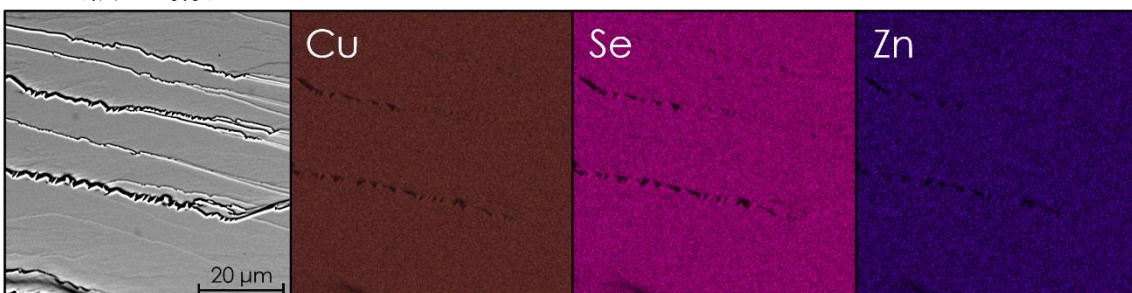

| At. conc. [%] | 57.15 | 42.54 | 0.31 |
|---------------|-------|-------|------|
|---------------|-------|-------|------|

**Figure S3.** SEM+EDX analysis of  $\text{Cu}_{1.8-x}\text{M}_x\text{Se}$  ( $\text{M} = \text{Ag}, \text{Ni}, \text{Zn}; x = 0, 0.01$ ) ingots.

$\text{Cu}_{1.8}\text{Se}$

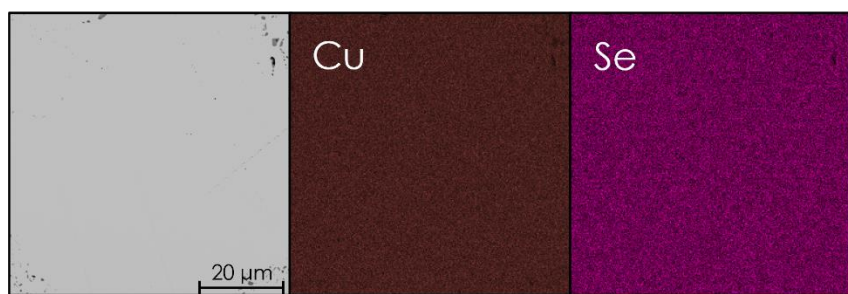

| At. conc. [%] | 59.17 | 40.83 |
|---------------|-------|-------|
|---------------|-------|-------|

$\text{Cu}_{1.79}\text{Ag}_{0.01}\text{Se}$

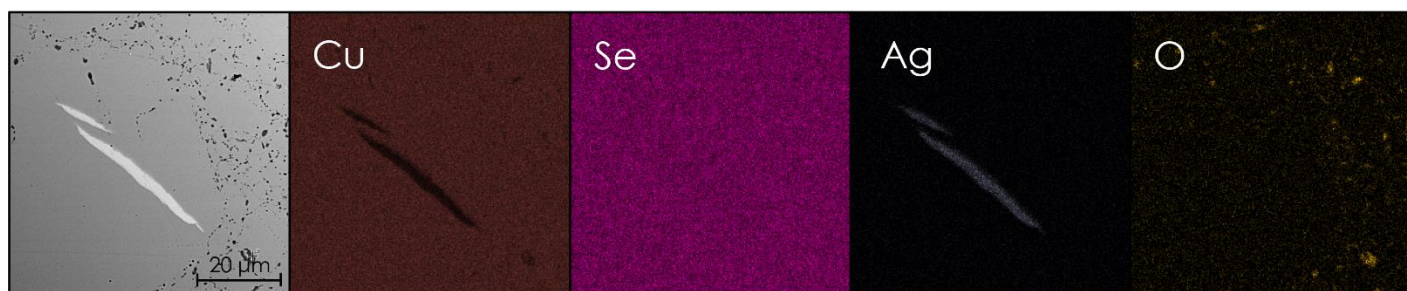

| At. conc. [%] | 55.61 | 39.99 | 1.17 | 3.32 |
|---------------|-------|-------|------|------|
|---------------|-------|-------|------|------|

$\text{Cu}_{1.79}\text{Ni}_{0.01}\text{Se}$

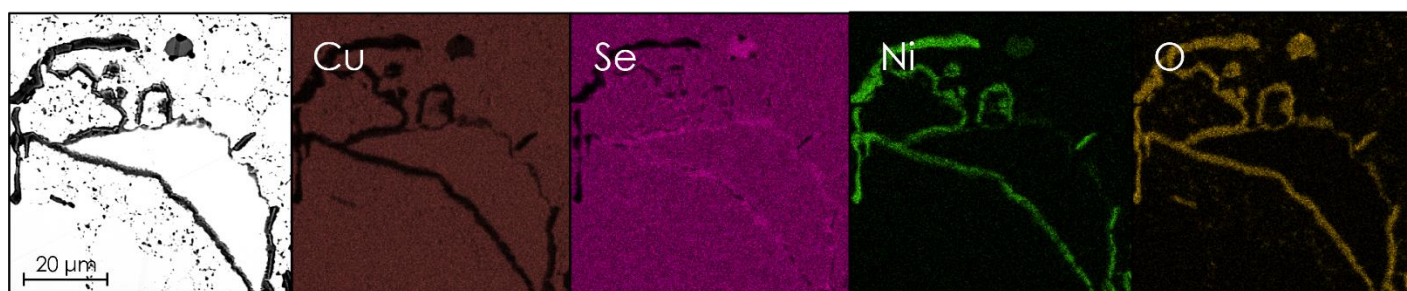

| At. conc. [%] | 46.97 | 35.60 | 4.74 | 12.69 |
|---------------|-------|-------|------|-------|
|---------------|-------|-------|------|-------|

$\text{Cu}_{1.79}\text{Zn}_{0.01}\text{Se}$

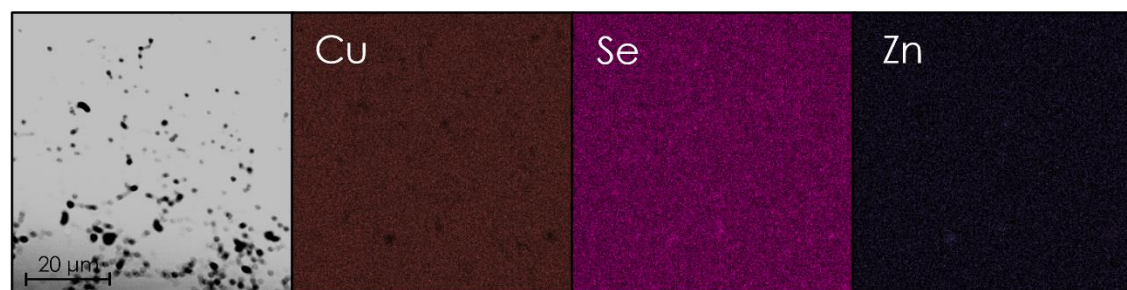

| At. conc. [%] | 58.25 | 41.31 | 0.44 |
|---------------|-------|-------|------|
|---------------|-------|-------|------|

**Figure S4.** SEM+EDX analysis of  $\text{Cu}_{1.8-x}\text{M}_x\text{Se}$  ( $\text{M} = \text{Ag}, \text{Ni}, \text{Zn}$ ;  $x = 0, 0.01$ ) pellets.

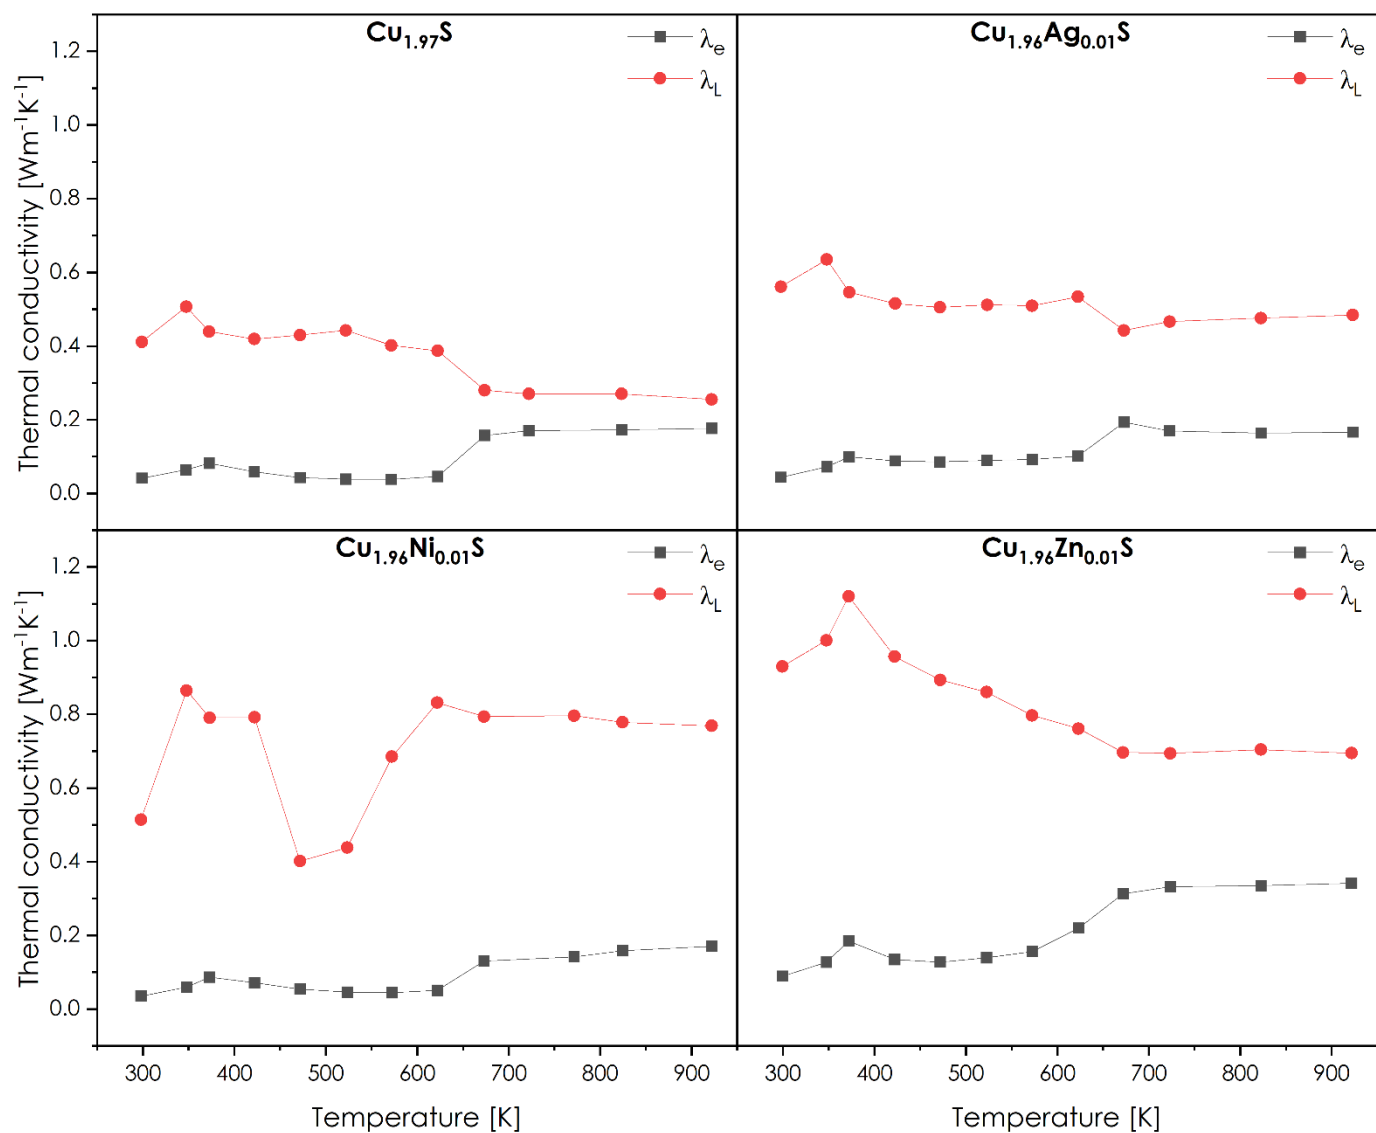

**Figure S5.** Lattice and electronic components of thermal conductivity as a function of temperature for copper (I) sulfides.



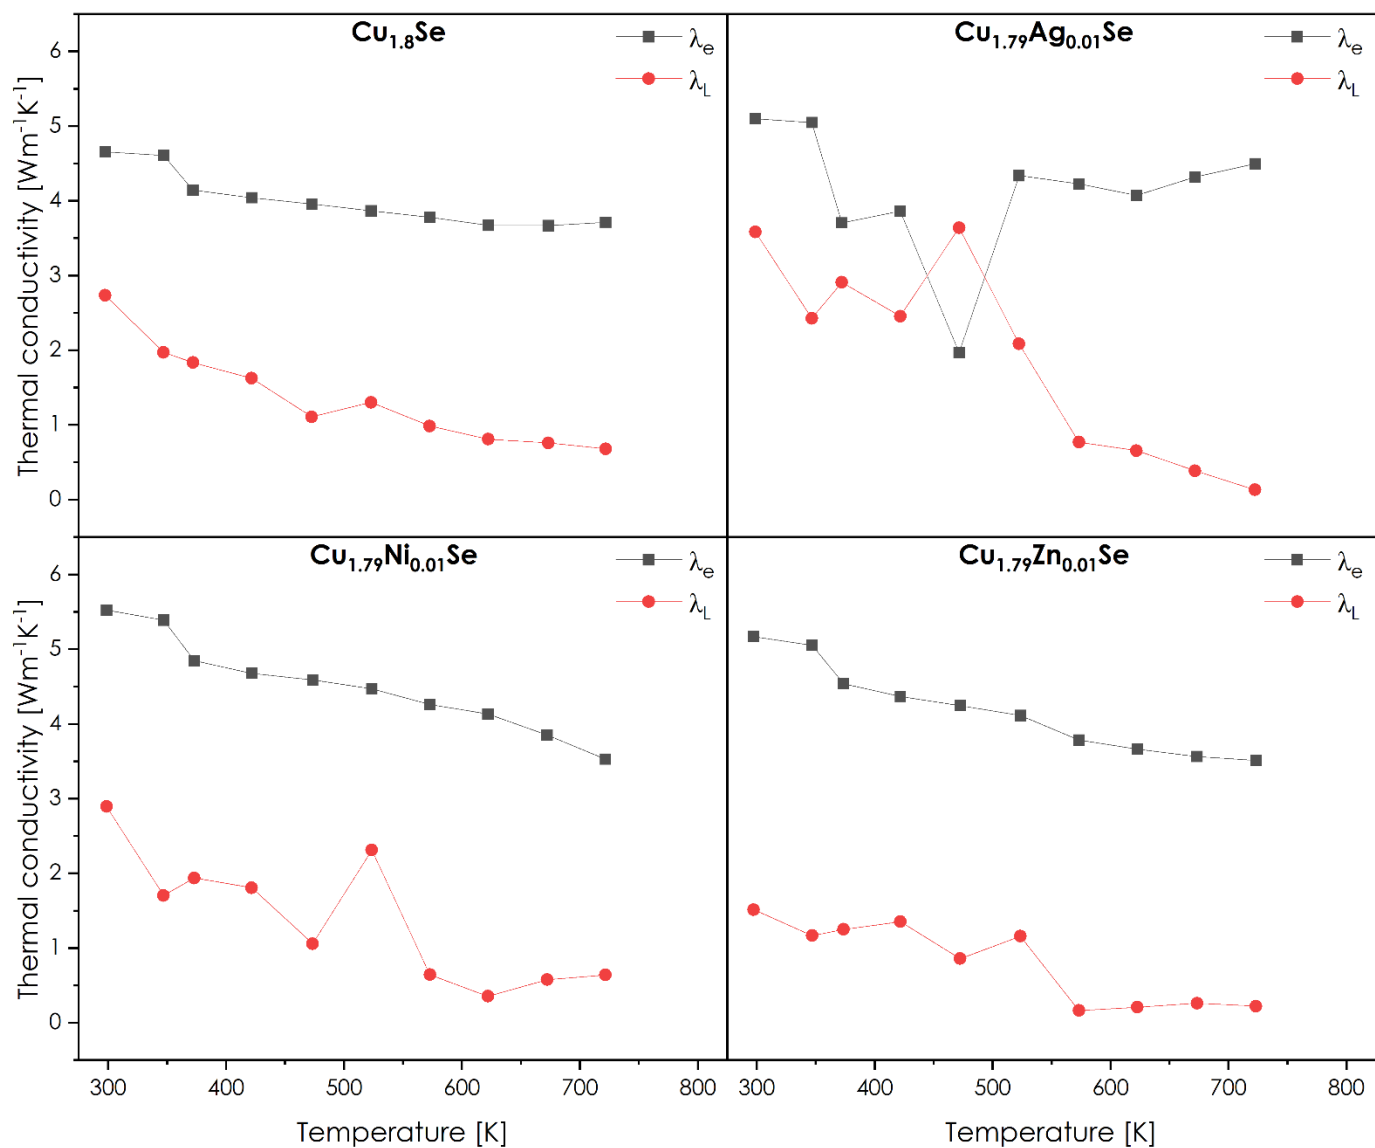

**Figure S6.** Lattice and electronic components of thermal conductivity as a function of temperature for copper (I) selenides.



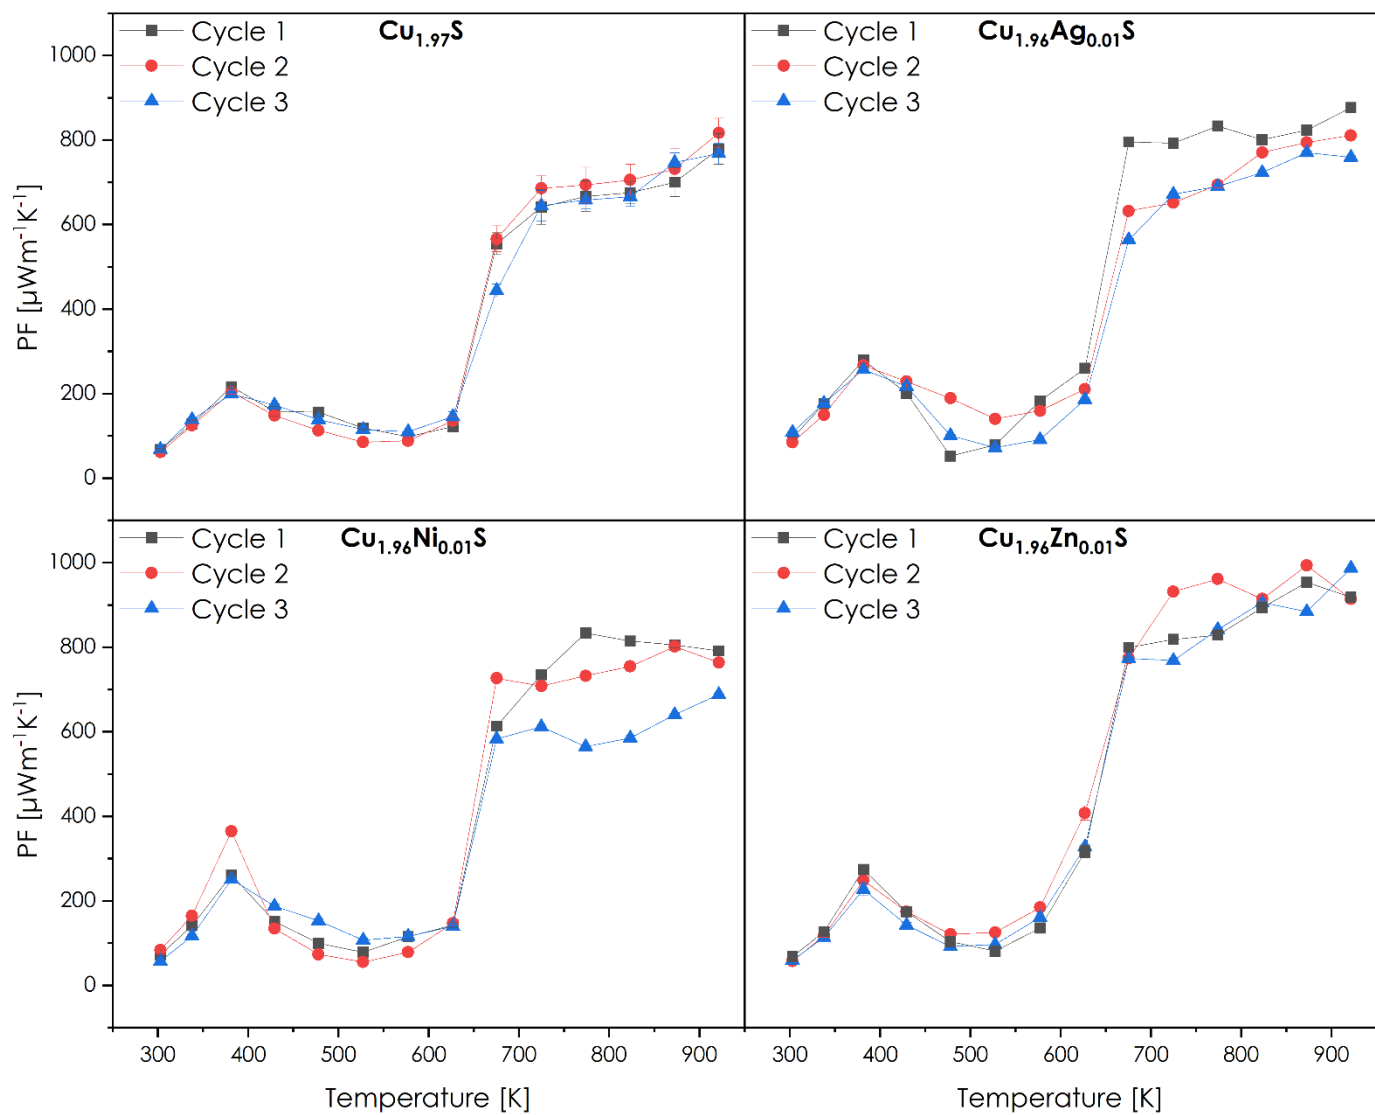

**Figure S7.** Power factor as a function of temperature for copper(I) sulfides.

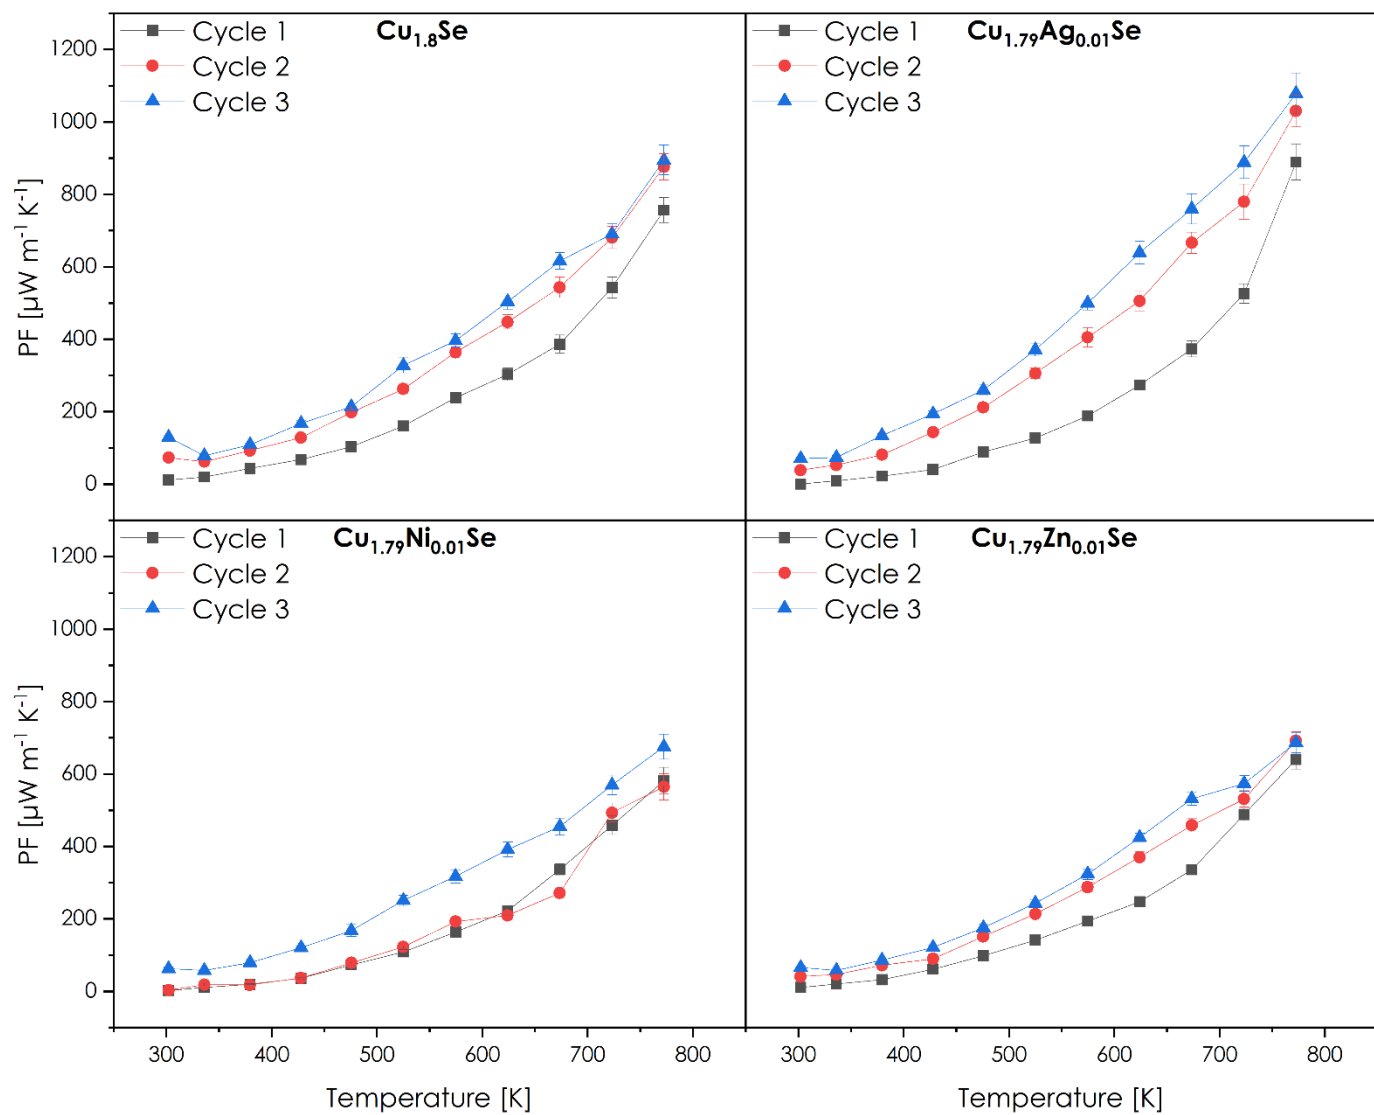

**Figure S8.** Power factor as a function of temperature for copper(I) selenides.

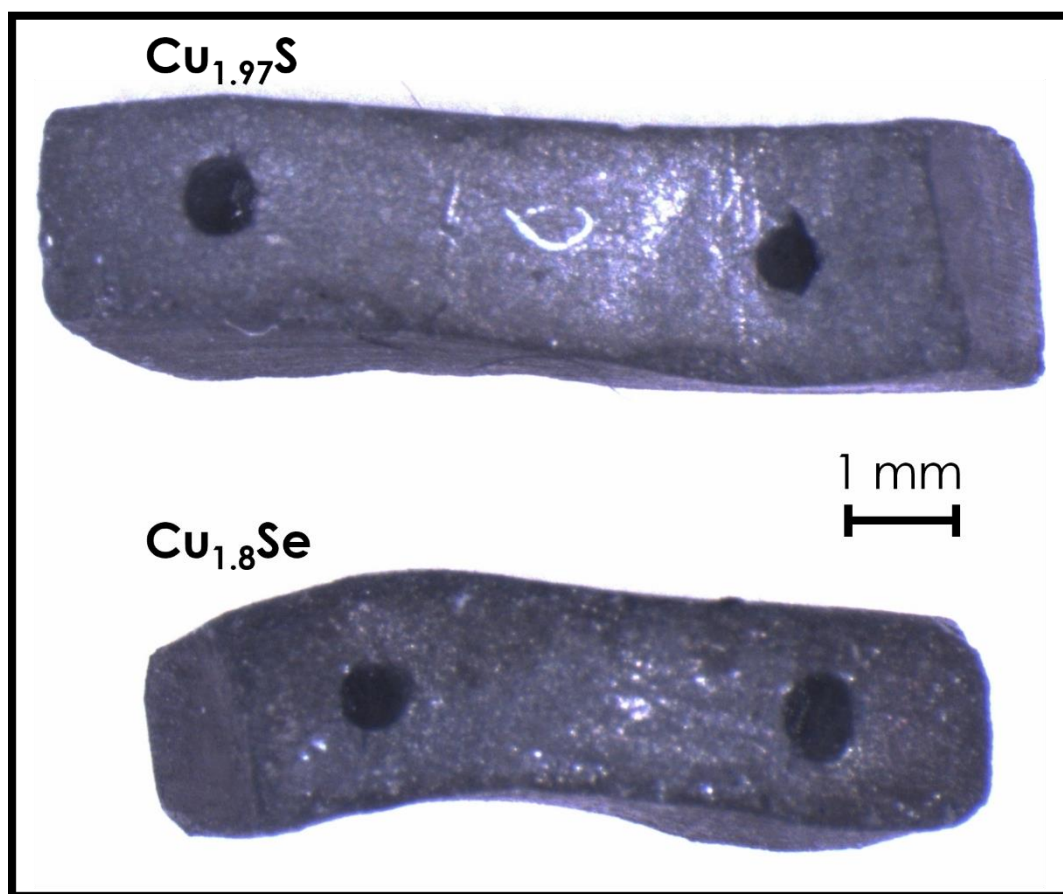

**Figure S9.** Optical microscope images of  $\text{Cu}_{1.97}\text{S}$  and  $\text{Cu}_{1.8}\text{Se}$  after TE measurements.
